# Supplementary material for: Short‐term outcomes in infants with mild neonatal encephalopathy: a retrospective, observational study
Source: BMC Pediatr. 2021 May 7;21:224. doi: 10.1186/s12887-021-02688-y (PMC8103637; doi:10.1186/s12887-021-02688-y)
Supplement: Supplementary file 1 — Maternal and neonatal characteristics and short-term outcomes in infants. This file shows maternal and neonatal characteristics and short-term outcomes of all screened infants by severity. [file 12887_2021_2688_MOESM1_ESM.xlsx]

## Sheet: Sheet1
Additional File 1. Maternal and neonatal characteristics and short-term outcomes in infants
Sarnat stage	Normal	Mild	Moderate	Severe
Maternal characteristics
Mothers, n (%)	5 (5)	61 (55)	31 (28)	13 (12)
Maternal age (years), median (IQR)	33 (32-35)	31 (28-34)	30 (27.5-34)	32 (31-34)
Hypertension of pregnancy, n (%)	1 (20)	4 (7)	1(3)	1 (8)
Non-reassuring fetal status, n (%)	3 (60)	38 (62)	23 (74)	11 (85)
Placental abruption, n (%)	0	14 (23)	13 (42)	4 (31)
Umbilical cord prolapse, n (%)	0	3 (5)	1 (3)	3 (23)
Premature rupture of membranes (≥18 h), n (%)	2 (40)	1 (2)	1 (3)	0
Chorioamnionitis, n (%)	0	0	2 (6)	0
Mode of delivery
Cesarean, n (%)	2 (40)	26 (43)	18 (58)	9 (69)
Vacuum extraction, n (%)	0	12 (20)	5 (16)	0
Natural delivery, n (%)	3 (60)	23 (38)	8 (26)	4 (31)
Neonatal characteristics
Infants, n (%)	5 (5)	61 (55)	31 (28)	13 (12)
Sex (male), n (%)	3 (60)	38 (62)	19 (61)	10 (77)
Gestational age (weeks), mean ± SD	41 (37-41)	39 (38-40)	38 (37-40)	39 (38-40)
Birth weight (g), median (IQR)	3134 ± 786	2918 ± 504	2882 ± 478	3212 ± 463
Outborn patients, n (%)	5 (100)	50 (82)	28 (90)	10 (77)
Apgar score at 1 min, median (IQR)	4 (4-5)	2 (1-3)	1 (1-2.75)	1 (0-1)
Apgar score at 5 min, median (IQR)	6 (5-7)	5 (3.25-6)	4 (2.25-6)	2 (1-3)
Intubation (in delivery room), n (%)	3 (60)	38 (62)	31 (100)	13 (100)
Cardiac compression, n (%)	0	5 (7)	7 (23)	6 (46)
CPR ≥10 min, n (%)	4 (80)	50 (82)	29 (94)	13 (100)
Blood gas pH, median (IQR)	7.13 (7.03-7.17)	7.04 (6.92-7.15)	7.00 (6.83-7.12)	6.74 (6.65-6.90)
Blood gas base deficit, median (IQR)	9 (4-9)	11 (8.7-19.3)	15 (11-20)	22 (20-28.5)
Thompson score, median (IQR)	0 (0-0)	2 (1-3)	8 (6-10)	15 (15-17)
Vasopressor use, n (%)	0	17 (28)	27 (87)	12 (92)
Therapeutic hypothermia, n (%)	0	12 (20)	30 (97)	13 (100)
Abnormal short-term outcomes, n (%)	0 (0)	11 (18)	14 (45)	12 (92)
CPR, cardiopulmonary resuscitation; IQR, interquartile range
Blood gas pH: lowest pH in either umbilical cord blood or infant blood recorded within the first 6 h of birth
Blood gas base deficit: highest base deficit in either umbilical cord blood or infant blood recorded within the first 6 h of birth
